# Supplementary material
Source: PubMed Central journal article supplement (PMC8262559)
Supplement: jci-131-147329-s208.pdf [file jci-131-147329-s208.pdf]

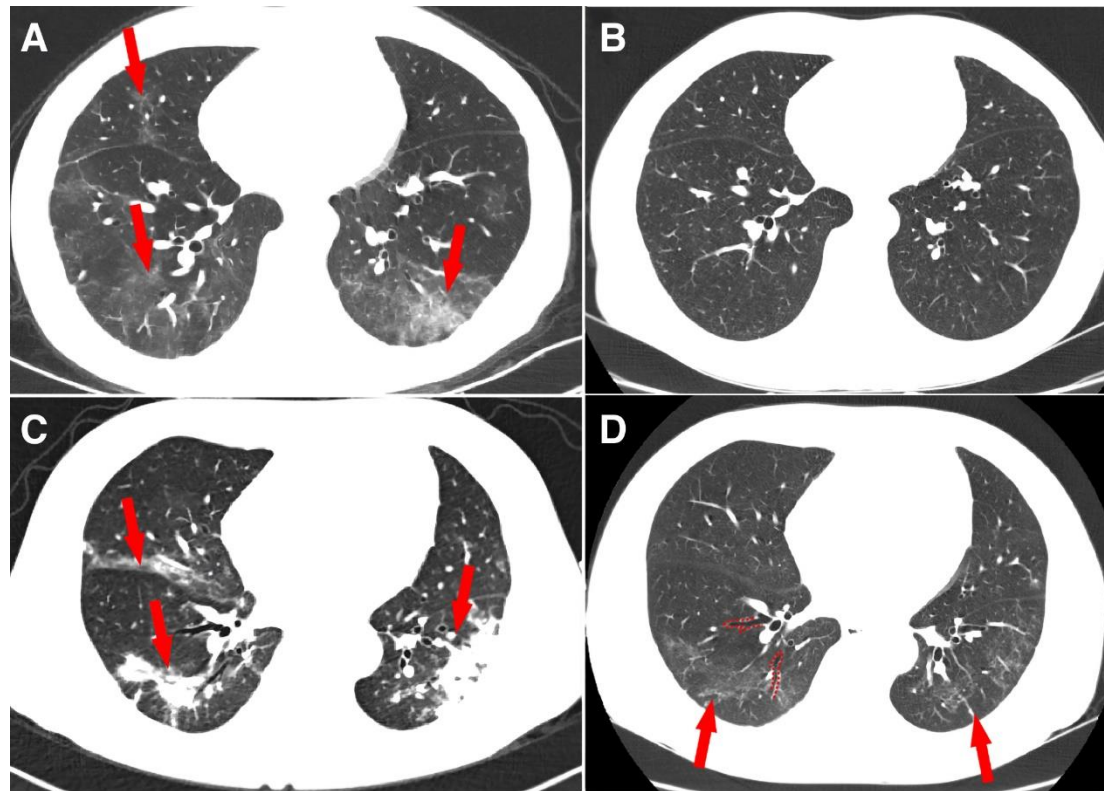

**Supplementary Figure S1.** CT findings of the confirmed COVID-19 of a mild type patient (A-B) and a severe type patient (C-D). A-B: CT maps from a 55-year-old male with dry cough and fever. The baseline chest CT showed bilateral subpleural ground glass opacity (GGO) (A) and totally absorbed three months follow up (B). C-D: CT maps from a 59-year-old male presented with high fever and cough. Baseline axial unenhanced chest CT (C) showed bilateral consolidation with GGO in the lower lobe (red arrows). Three months follow up the consolidation was absorbed and some fibers strand (arrows) and bronchiectasis (dotted line) in the lower lobe still existed.

**Supplementary Table S1.** Collection of the results of three mean XTRACT statistics, such as volume, length, FA of all subjects. *Note: Significant differences were labeled with bold fonts combined with different symbols, # (NC-MG), ∅ (MG-SG), \* (NC-SG).* Data represent mean ± SD.

| Tract | Volume (mm <sup>3</sup> ) |                     |                     | Length (mm) |                     |                     | Mean FA (per tract) |                     |                     |
|-------|---------------------------|---------------------|---------------------|-------------|---------------------|---------------------|---------------------|---------------------|---------------------|
|       | NC                        | MG                  | SG                  | NC          | MG                  | SG                  | NC                  | MG                  | SG                  |
| AC    | 2340±653                  | 2311±488            | 2415±586            | 21.21±7.39  | <b>24.49±7.91 ∅</b> | 20.39±6.82          | 0.37±0.055          | <b>0.40±0.064 ∅</b> | 0.36±0.052          |
| AF_L  | 19678±2643                | 18559±2055          | 18901±2660          | 46.03±3.16  | <b>44.08±2.99 #</b> | 46.27±3.03          | 0.43±0.013          | 0.42±0.020          | 0.42±0.020          |
| AF_R  | 20949±2517                | 20001±2054          | 20547±2576          | 44.64±2.84  | 43.72±2.68          | 45.07±3.01          | 0.43±0.015          | 0.43±0.021          | 0.42±0.016          |
| AR_L  | 6000±1286                 | <b>5051±1021 #</b>  | 5496±1422           | 29.54±7.74  | 26.35±7.85          | 30.57±7.60          | 0.38±0.022          | 0.38±0.019          | <b>0.38±0.020 *</b> |
| AR_R  | 5219±1376                 | 5077±1519           | 4557±1555           | 21.82±7.26  | <b>25.29±7.90 ∅</b> | 19.33±8.59          | 0.38±0.018          | 0.38±0.015          | 0.39±0.020          |
| ATR_L | 14506±2016                | 13926±1767          | 13841±1488          | 44.45±3.54  | 43.72±2.22          | 45.52±3.26          | 0.39±0.018          | <b>0.38±0.021 #</b> | 0.38±0.017          |
| ATR_R | 15420±2634                | <b>14225±2081 #</b> | <b>14039±1531 *</b> | 46.32±3.29  | <b>44.01±3.68 #</b> | 45.39±2.61          | 0.38±0.013          | <b>0.37±0.018 #</b> | <b>0.37±0.015 *</b> |
| CBD_L | 7996±1316                 | <b>7403±807 #</b>   | <b>7243±1207 *</b>  | 70.61±6.98  | <b>71.12±4.43 ∅</b> | 68.19±5.39          | 0.44±0.022          | 0.44±0.020          | 0.43±0.021          |
| CBD_R | 7824±1671                 | 7114±1361           | <b>7155±1224 *</b>  | 72.93±9.39  | <b>67.89±7.30 #</b> | <b>68.11±7.75 *</b> | 0.41±0.020          | 0.41±0.022          | 0.41±0.022          |
| CBP_L | 1446±562                  | 1286±433            | 1439±612            | 22.94±7.31  | 23.13±5.10          | 23.61±5.30          | 0.40±0.041          | <b>0.42±0.046 ∅</b> | 0.39±0.038          |
| CBP_R | 1828±968                  | 1657±807            | 1722±777            | 25.68±5.81  | 25.01±4.12          | 26.12±3.59          | 0.38±0.036          | 0.39±0.030          | 0.37±0.033          |
| CBT_L | 3171±605                  | 3134±541            | 3037±513            | 24.95±3.33  | 24.48±2.43          | 25.15±3.24          | 0.34±0.031          | 0.33±0.031          | 0.33±0.026          |
| CBT_R | 3364±460                  | 3125±495            | 3365±618            | 24.40±3.87  | 22.83±2.89          | 24.37±3.85          | 0.35±0.025          | 0.34±0.026          | <b>0.33±0.017 *</b> |
| CST_L | 15324±2096                | 14725±1609          | <b>14411±1677 *</b> | 79.39±3.06  | <b>77.48±2.88 #</b> | 78.66±3.49          | 0.47±0.017          | 0.46±0.022          | 0.46±0.019          |
| CST_R | 15445±1772                | 14987±1767          | 14724±1582          | 77.83±3.04  | <b>75.94±3.75 #</b> | 77.65±3.51          | 0.47±0.015          | 0.47±0.023          | 0.47±0.015          |
| FAT_L | 9090±1425                 | 8652±1153           | 8748±1418           | 35.37±2.91  | 34.23±2.46          | <b>33.58±2.43 *</b> | 0.37±0.019          | 0.37±0.023          | <b>0.36±0.020 *</b> |
| FAT_R | 9096±1431                 | <b>8340±1208 #</b>  | <b>8426±1560 *</b>  | 33.2±2.690  | 32.14±1.82          | 32.75±2.43          | 0.37±0.016          | 0.36±0.022          | 0.36±0.019          |
| FMA   | 19257±2074                | 18747±2035          | 18703±2204          | 77.73±5.84  | 76.64±5.22          | 77.93±6.33          | 0.46±0.022          | <b>0.47±0.024 ∅</b> | 0.45±0.027          |
| FMI   | 21354±3510                | <b>19862±2961 #</b> | <b>19339±2837 *</b> | 50.95±3.65  | <b>47.48±3.39 #</b> | 49.89±2.63          | 0.45±0.023          | 0.45±0.027          | 0.44±0.024          |
| FX_L  | 6009±1669                 | 5416±1889           | <b>5030±2101 *</b>  | 46.25±23.2  | 39.34±23.1          | 44.34±23.01         | 0.32±0.034          | 0.30±0.074          | <b>0.28±0.078 *</b> |
| FX_R  | 5594±2815                 | 5507±1541           | 5706±2129           | 46.17±21.7  | 50.69±17.7          | 41.07±19.4          | 0.31±0.067          | 0.31±0.032          | 0.32±0.031          |

|        |             |                     |                      |            |                     |                     |            |                     |                     |
|--------|-------------|---------------------|----------------------|------------|---------------------|---------------------|------------|---------------------|---------------------|
| IFO_L  | 22755±3485  | 22227±2538          | 22443±2520           | 68.6±4.920 | 68.48±3.54          | 69.29±4.18          | 0.44±0.014 | 0.44±0.017          | 0.44±0.019          |
| IFO_R  | 23525±3063  | 22510±1949          | <b>21974±2342 *</b>  | 69.53±5.79 | 68.21±5.29          | 68.56±4.82          | 0.44±0.013 | 0.44±0.018          | <b>0.43±0.019 *</b> |
| ILF_L  | 12576±1893  | <b>11374±1190 #</b> | <b>11412±1691 *</b>  | 44.03±4.53 | 43.24±5.76          | <b>41.06±4.85 *</b> | 0.39±0.018 | <b>0.39±0.020 ☹</b> | <b>0.37±0.024 *</b> |
| ILF_R  | 13863±2118  | <b>12627±1640 #</b> | <b>12222±1728 *</b>  | 46.61±6.77 | <b>43.18±4.76 #</b> | <b>43.54±4.85 *</b> | 0.40±0.019 | 0.40±0.023          | <b>0.39±0.021 *</b> |
| MCP    | 15160±2708  | 14509±3916          | 14931±2227           | 57.25±6.47 | 53.59±11.8          | 55.83±4.77          | 0.44±0.029 | 0.43±0.026          | 0.44±0.025          |
| MDLF_L | 17303±2157  | 16332±1658          | 17110±2072           | 61.78±3.79 | 60.36±3.92          | 62.35±4.15          | 0.41±0.012 | <b>0.41±0.013 ☹</b> | <b>0.40±0.020 *</b> |
| MDLF_R | 18292±2325  | 17315±1601          | 17515±2340           | 61.15±3.53 | 59.47±3.87          | 60.86±3.57          | 0.42±0.015 | 0.42±0.015          | 0.42±0.018          |
| OR_L   | 14731±1658  | 14344±1720          | 14216±1350           | 55.51±3.13 | <b>53.56±3.24 #</b> | 56.05±3.20          | 0.46±0.013 | 0.46±0.017          | <b>0.45±0.021 *</b> |
| OR_R   | 15961±1989  | 15128±1516          | <b>14923±1770 *</b>  | 55.73±3.18 | 54.22±3.80          | 56.11±3.15          | 0.46±0.014 | 0.46±0.022          | <b>0.45±0.019 *</b> |
| SLF1_L | 12939±3147  | 11717±2699          | 12009±2969           | 45.71±7.18 | 45.09±6.79          | 44.19±6.19          | 0.38±0.019 | <b>0.38±0.017 ☹</b> | <b>0.37±0.022 *</b> |
| SLF1_R | 12133±2499  | 11071±2707          | 11412±2620           | 41.48±6.71 | 40.42±6.85          | 41.6±6.030          | 0.38±0.017 | <b>0.38±0.015 ☹</b> | <b>0.37±0.022 *</b> |
| SLF2_L | 10308±2484  | 9733±2850           | 10566±2199           | 47.17±9.68 | 45.29±10.3          | 45.42±7.48          | 0.35±0.016 | <b>0.35±0.017 ☹</b> | <b>0.33±0.017 *</b> |
| SLF2_R | 10949±3067  | 10828±2349          | <b>9365.8±2541 *</b> | 45.39±11.8 | <b>49.17±3.70 ☹</b> | 41.82±13.1          | 0.34±0.065 | 0.35±0.022          | 0.34±0.018          |
| SLF3_L | 15058±2418  | 14099±1926          | 15250±1923           | 46.18±4.01 | 47.24±5.45          | 47.40±3.84          | 0.37±0.013 | <b>0.37±0.016 ☹</b> | <b>0.36±0.017 *</b> |
| SLF3_R | 14612±2120  | 14021±1787          | 14448±2566           | 47.25±2.84 | 46.19±3.16          | 47.19±3.96          | 0.37±0.017 | 0.37±0.020          | <b>0.36±0.018 *</b> |
| STR_L  | 13566±1877  | 12903±1408          | 13004±1454           | 40.89±2.11 | 40.28±1.59          | <b>39.86±2.03*</b>  | 0.41±0.021 | 0.41±0.026          | 0.40±0.020          |
| STR_R  | 13478±1482  | 12851±1444          | 13442±1522           | 42.03±1.80 | 41.38±1.83          | 41.58±1.77          | 0.40±0.017 | 0.40±0.027          | 0.39±0.017          |
| UF_L   | 9758±1769   | 10032±1540          | 10044±1597           | 49.36±4.52 | 50.59±4.91          | 50.22±4.79          | 0.37±0.015 | 0.38±0.018          | 0.37±0.017          |
| UF_R   | 10138±1590  | 9922±1465           | 10093±1345           | 47.84±4.08 | 47.30±3.41          | 47.24±3.89          | 0.37±0.012 | 0.37±0.020          | 0.37±0.017          |
| VOF_L  | 7181.2±1101 | 7063±1235           | 7397.2±1194          | 22.85±2.46 | 22.91±1.95          | 23.70±3.57          | 0.33±0.021 | 0.33±0.019          | 0.32±0.022          |
| VOF_R  | 7408.1±1413 | 7052±1170           | 7367±836             | 24.43±3.08 | 24.43±2.83          | 24.62±2.54          | 0.33±0.025 | 0.33±0.023          | 0.33±0.022          |
